# Supplementary material
Source: PubMed Central journal article supplement (PMC4380076)
Supplement: supp_ddv003_ddv003supp.pdf [file supp_ddv003_ddv003supp.pdf]

## Supporting information

### **Figure S1. Rbfox1 expression level increases during primary myoblast differentiation.**

Primary myoblasts were isolated and in vitro differentiated. Cells were collected at the indicated time points and used for protein extraction. Western blot analysis for Rbfox1 showed increased protein expression during differentiation (top panel). Laminin B (middle panel) and Ponceau staining (bottom panel) show equal loading between samples.

### **Figure S2. Rbfox1 depletion in satellite cells does not disrupt skeletal muscle regeneration.**

(A) The genotype of control and *Rbfox1*<sup>-/-</sup> mice is schematically represented. In the control mouse (left), the floxed *Rbfox1* exon 11 and 12 are represented as red boxes, flanked by two loxP sites (green boxes). Wild-type alleles are represented as solid black bars. In *Rbfox1*<sup>-/-</sup> mice (right), expression of Cre recombinase under the control of the *Pax7* gene promoter (green box), drives recombination between the loxP sites and deletion of *Rbfox1* exons 11 and 12. (B) Scheme of tamoxifen administration, satellite cell isolation and differentiation. (C) Total RNA was isolated from differentiated (96 hours) myotubes. Quantitative RT-PCR was used to assess *Rbfox1* depletion efficiency. The results are expressed as the mean  $\pm$  s.e.m. and the *p* values were estimated using two-tailed Student's T-test (\*\* *p*  $\leq$  0.01). (D) Hematoxylin and eosin staining of cross-sections of control and *Rbfox1*<sup>-/-</sup> tibialis anterior muscles at days 4, 14 and 30 after cardiotoxin injury. Scale bar 20  $\mu$ m.

**Figure S3. Analysis of regeneration markers upon *Rbfox1* depletion.** (A)

Immunostaining for laminin and MHC fast (top panels) or slow (bottom panel) on control and *Rbfox1*<sup>-/-</sup> tibialis anterior muscles. Scale bar 30 μm. (B) Top panel: immunostaining for desmin on control and *Rbfox1*<sup>-/-</sup> tibialis anterior muscles. Bottom panel: immunostaining for laminin and neonatal MHC. (C) Total RNA was extracted from control and *Rbfox1*<sup>-/-</sup> tibialis anterior muscles and quantitative RT-PCR analysis was performed in triplicate using TaqMan probes for *Fbxo32* and *Trim63*. Data were normalized to the *Rpl30* content and expressed as fold increase. The results were expressed as the mean ± s.e.m.

**Figure S4. RT-PCR validation of alternative splicing events.**

(A) RT-PCR validation (*n* = 2 biological replicates) for AS events ( $\Delta\text{PSI} \geq 10\%$ ) regulated by *Rbfox1*. PSI is indicated below each lane.

**Figure S5. Depletion of *Rbfox1* alters calcium kinetics and decreases muscle force generation.**

(A) Immunostaining for *Ryr1* and *Serca1* in two month-old control and *Rbfox1*<sup>-/-</sup> gastrocnemius muscles shows early mislocalization of both calcium channels in *Rbfox1*<sup>-/-</sup> muscle (arrows). Scale bar 20 μm. (B) Top panel. Average time to the maximum response in FDB myofibers stimulated with 4-CMC. Bottom panel. Amplitude of the calcium transient stimulated with 1mM of 4-CMC. (C) Area under the curve (AUC) of the calcium transient evoked electrically with a 50 Hz (top) or 100 Hz train (bottom). \*\*

indicates  $p \leq 0.01$  as determined by two-tailed Student's T-test. (D) Force-frequency relationship obtained from *ex vivo* FBD muscle ( $n = 6$  mice for each genotype) isolated from either male (left panel) or female (right panel) five month-old control and *Rbfox1*<sup>-/-</sup> mice.

**Table S1. Parameters of RNA-Seq results on tibialis anterior muscle from control and *Rbfox1*<sup>-/-</sup>.**

**Table S2. List of genes undergoing expression changes in *Rbfox1*<sup>-/-</sup>.**

The table also contains a list of genes sorted based on  $p \leq 0.0010$  and fold change  $\geq 1.5$

**Table S3. List of AS events in *Rbfox1*<sup>-/-</sup>.**

A total of 210 events are listed with BF  $\geq 2.0$  and  $\Delta$ PSI (MPD)  $\geq 0.10$

**Table S4. List of primers used to validate splicing events**

# Figure S1

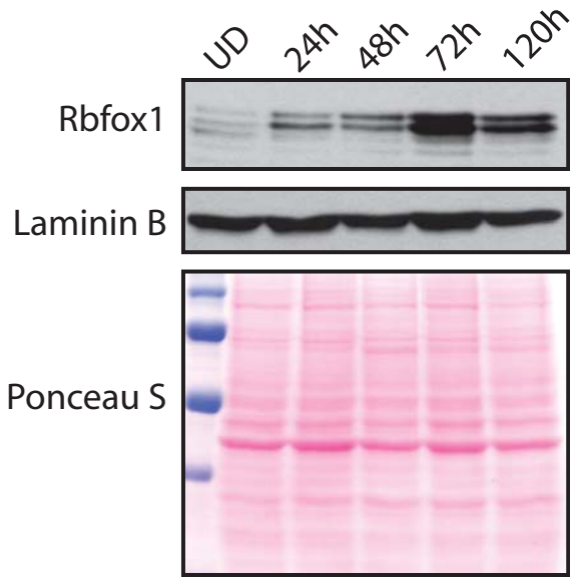

# Figure S2

A

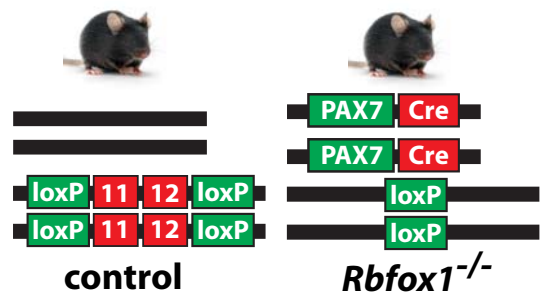

B

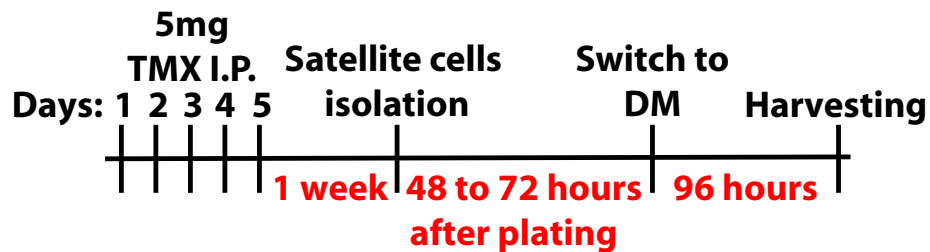

C

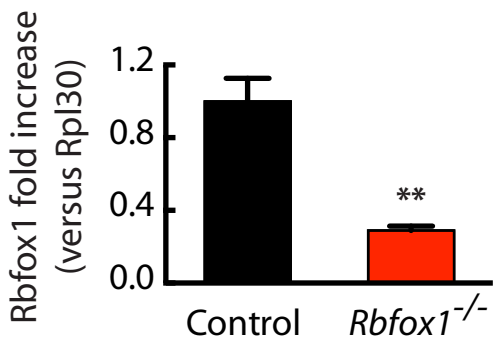

D

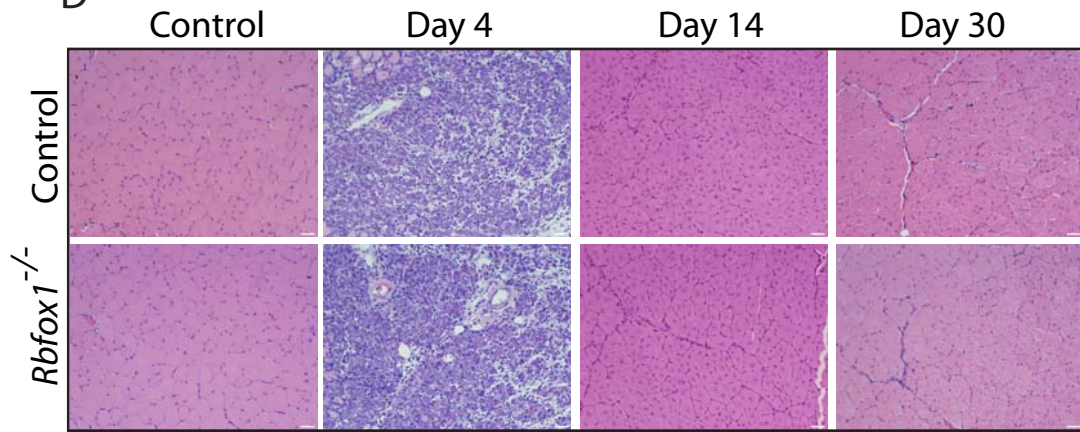

**Figure S3**

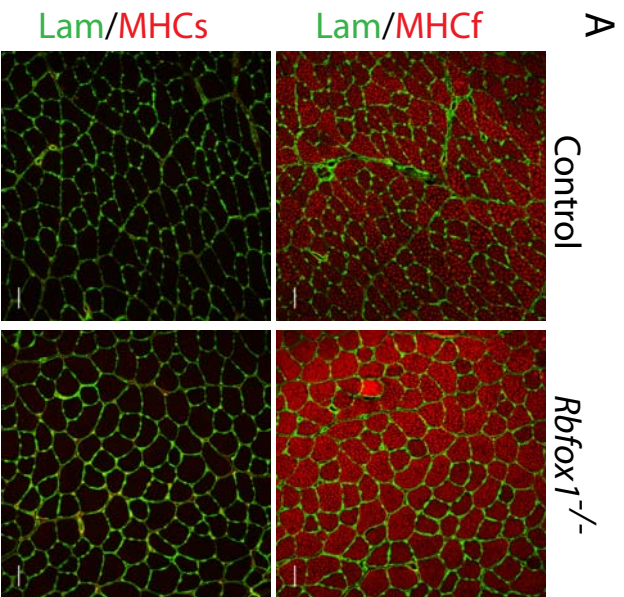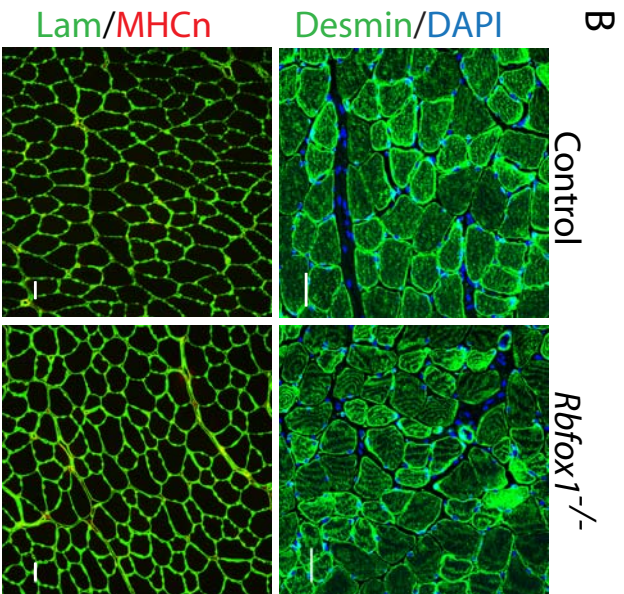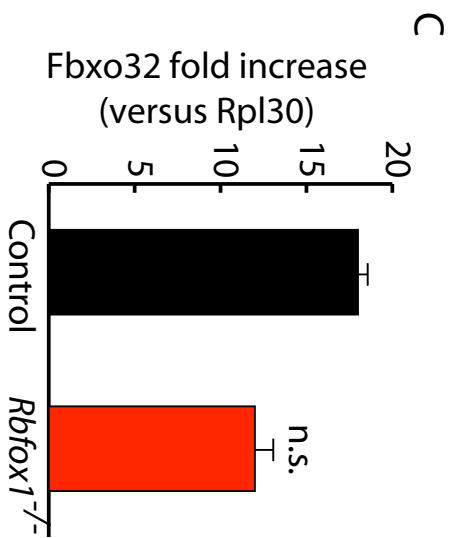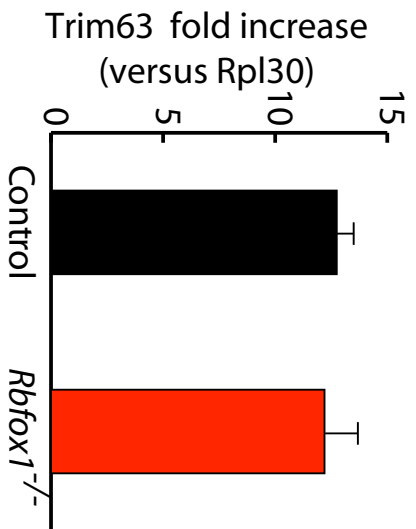

**Figure S4**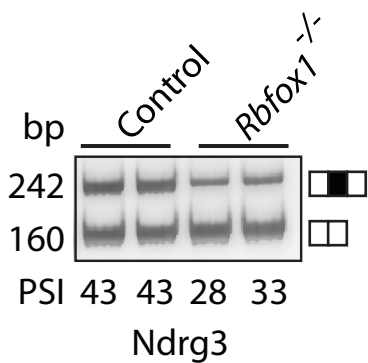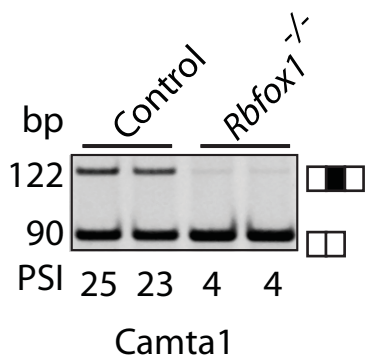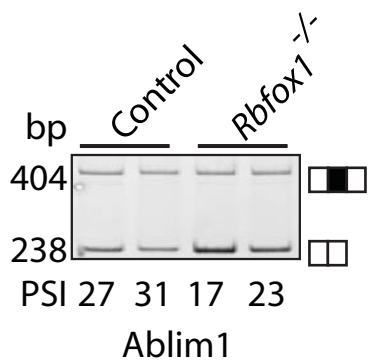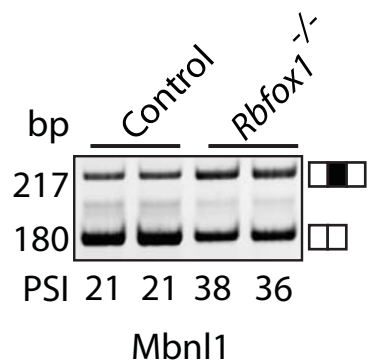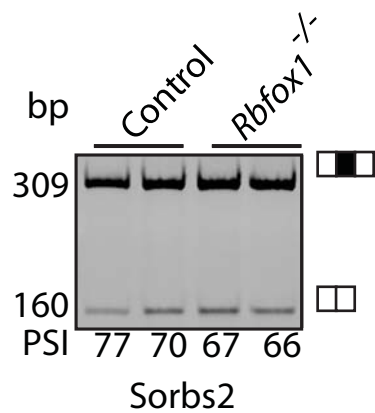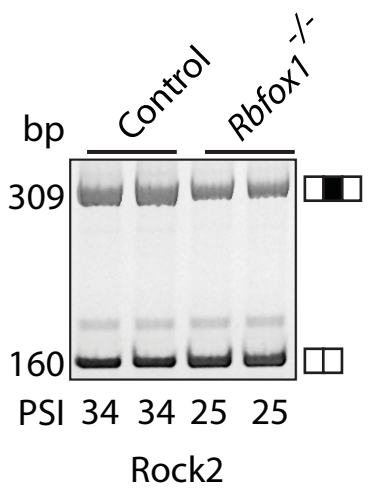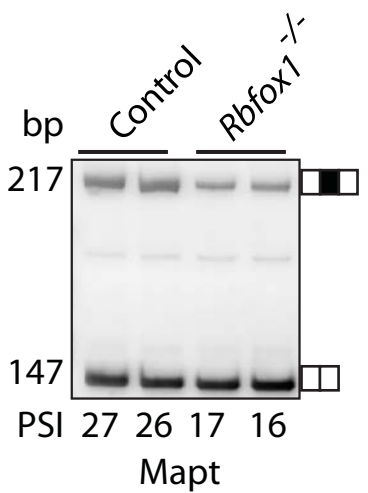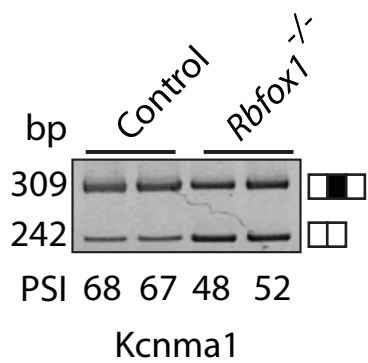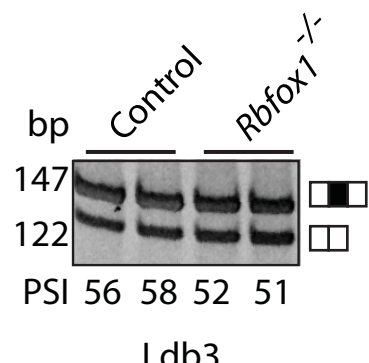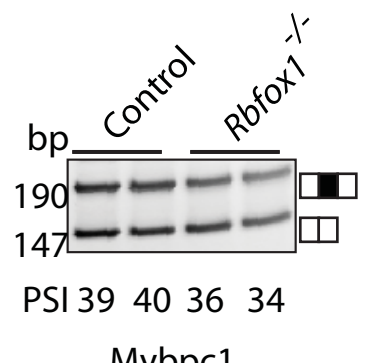

**Figure S5**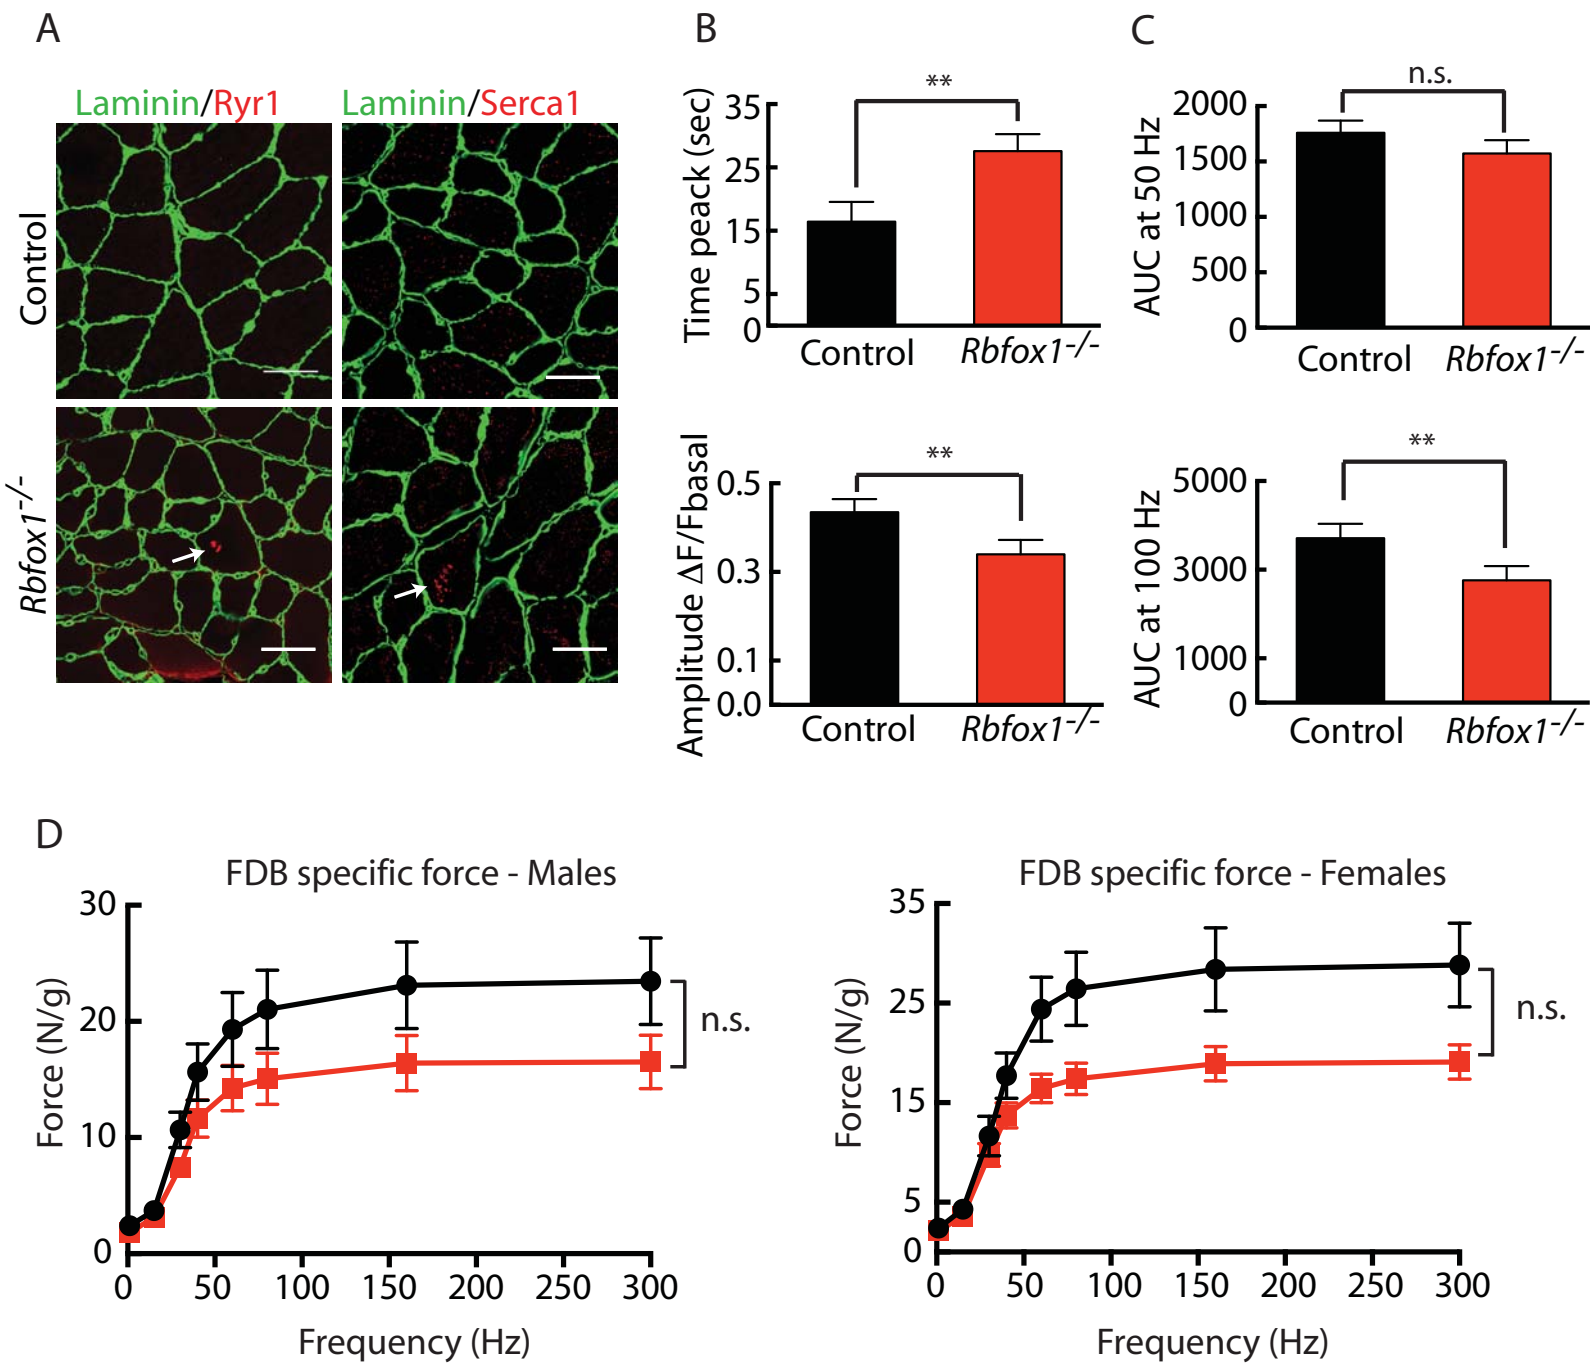



Table S1. Parameters of RNA-seq experiments on tibialis anterior muscle from control and *Rbfox1*<sup>-/-</sup>.

| RNA-Seq on tibialis anterior muscle (poly A selected) |             |              |
|-------------------------------------------------------|-------------|--------------|
| Sample                                                | # reads     | Mapping rate |
| <i>Control</i> (replicate 1)                          | 153,405,533 | 91.00%       |
| <i>Control</i> (replicate 2)                          | 139,796,822 | 95.10%       |
| <i>Rbfox1</i> <sup>-/-</sup> (replicate 1)            | 141,703,878 | 95.10%       |
| <i>Rbfox1</i> <sup>-/-</sup> (replicate 2)            | 134,271,609 | 95.20%       |

Table S4. List of primers used to validate splicing events

| Gene name     | Alternative exon genomic coordinates                | Forward primer                      | Revers primer                       | exon length (nt) | PCR product sizes |
|---------------|-----------------------------------------------------|-------------------------------------|-------------------------------------|------------------|-------------------|
| <i>Ablim1</i> | chr19:57059085-57059204                             | GGTTATCAAGA<br>TGTCGGGATC<br>GGA    | CTGGAACATG<br>GAAATGTTTA<br>GGGC    | 120              | 355-235           |
| <i>Ablim2</i> | chr5:35848804-35848905                              | CTGGTACTGTG<br>AGTGTGGTAC<br>CAG    | CGTGCTGTTT<br>GTAGATAGGG<br>GGTTT   | 102              | 255-153           |
| <i>Ablim2</i> | chr5:35849516-35849569                              | GGGGATCAGGA<br>TGATCGGTCCT<br>ACA   | CTTCCTGCTGT<br>CCTGGTCAAA<br>GCTG   | 54               | 228-174           |
| <i>Ambra1</i> | chr2:91805024-91805110                              | GTGGGGGTGGC<br>CTTTAACCAGG<br>AGA   | CTTGGAACAA<br>ATCGTCCAAG<br>T       | 87               | 485-398           |
| <i>Camk2b</i> | chr11:5979673-5979721:-<br>@chr11:5972813-5972888:- | GAATCTTCCGA<br>CAGCACCAACA<br>CAA   | TGGTCTTGAT<br>GATTTCTGC<br>TTCC     | 114, 129,<br>129 | 448-76            |
| <i>Camk2d</i> | chr3:126805857-126805916                            | GGCGCCATCTT<br>GACAACTATGC<br>TGG   | TGGTGTTTGA<br>GCTCTCAGTT<br>GACTC   | 38               | 208-148           |
| <i>Camk2g</i> | chr14:20747819-20747851                             | CTGCCAAAAGC<br>CTATTGAACAA<br>GAA   | CATGGCCGTC<br>TGCAAGGGCG<br>C       | 33               | 146-113           |
| <i>Camta1</i> | chr4:151071426-151071456                            | GAGCAGTTTGC<br>TGACCAAAAAG<br>CAG   | CCTTGGCCTTT<br>TTCAATTCTTT<br>CACT  | 31               | 132-101           |
| <i>Clmn</i>   | chr12:104773182-104773274                           | GACCATTTTAG<br>CTATGTTCAATT<br>GA   | AGCCGGCTGA<br>CATCAAGCTG<br>TGGGAA  | 93               | 332-239           |
| <i>Kenma1</i> | chr14:23336040-23336120                             | GATTCACACCT<br>CCTGGAATGGA<br>CAG   | CGCGTCATG<br>AGTGAGTCCA<br>GGACG    | 81               | 326-245           |
| <i>Kcnq5</i>  | chr1:21461551-21461607                              | GAAAGAACAAG<br>GGGAGGCATCA<br>AGC   | GAGCACTGAC<br>ATCACTGCCG<br>AGGGC   | 57               | 207-150           |
| <i>Ldb3</i>   | chr14:34569713-34569727                             | CACCCCGATCA<br>GCATGTACTCA<br>CAG   | GAGAGGCGCT<br>GTCCACCGCC<br>AAGTC   | 15               | 140-125           |
| <i>Mapt</i>   | chr11:104287123-104287209                           | GCTTTGAACCA<br>GTATGGCTGAC<br>CCT   | TGTCTCCGAT<br>GCCTGCTTCTT<br>CGG    | 87               | 224-137           |
| <i>Mark2</i>  | chr19:7279111-7279278                               | AAATCTGTCTTT<br>CAGGTTTGCCA<br>GAAG | TCTTTGCTTTC<br>AGGTTTCATTC<br>AGTTC | 168              | 222-54            |
| <i>Mast2</i>  | chr4:116333413-116333433                            | GTAACAGTCCC<br>TTGGACAGCCC<br>C     | AGAGACTGTA<br>GAGCTAGGAG<br>TGTT    | 21               | 176-155           |
